# Supplementary material
Source: Elsevier journal article supplement (https://www.sciencedirect.com/science/article/pii/S0366317521000935)
Supplement: mmc1 [file S0366317521000935:mmc1.doc]

**Supplementary Information**

The experimental and predicted by Thomas model breakthrough curves of C and C-Bent.

**
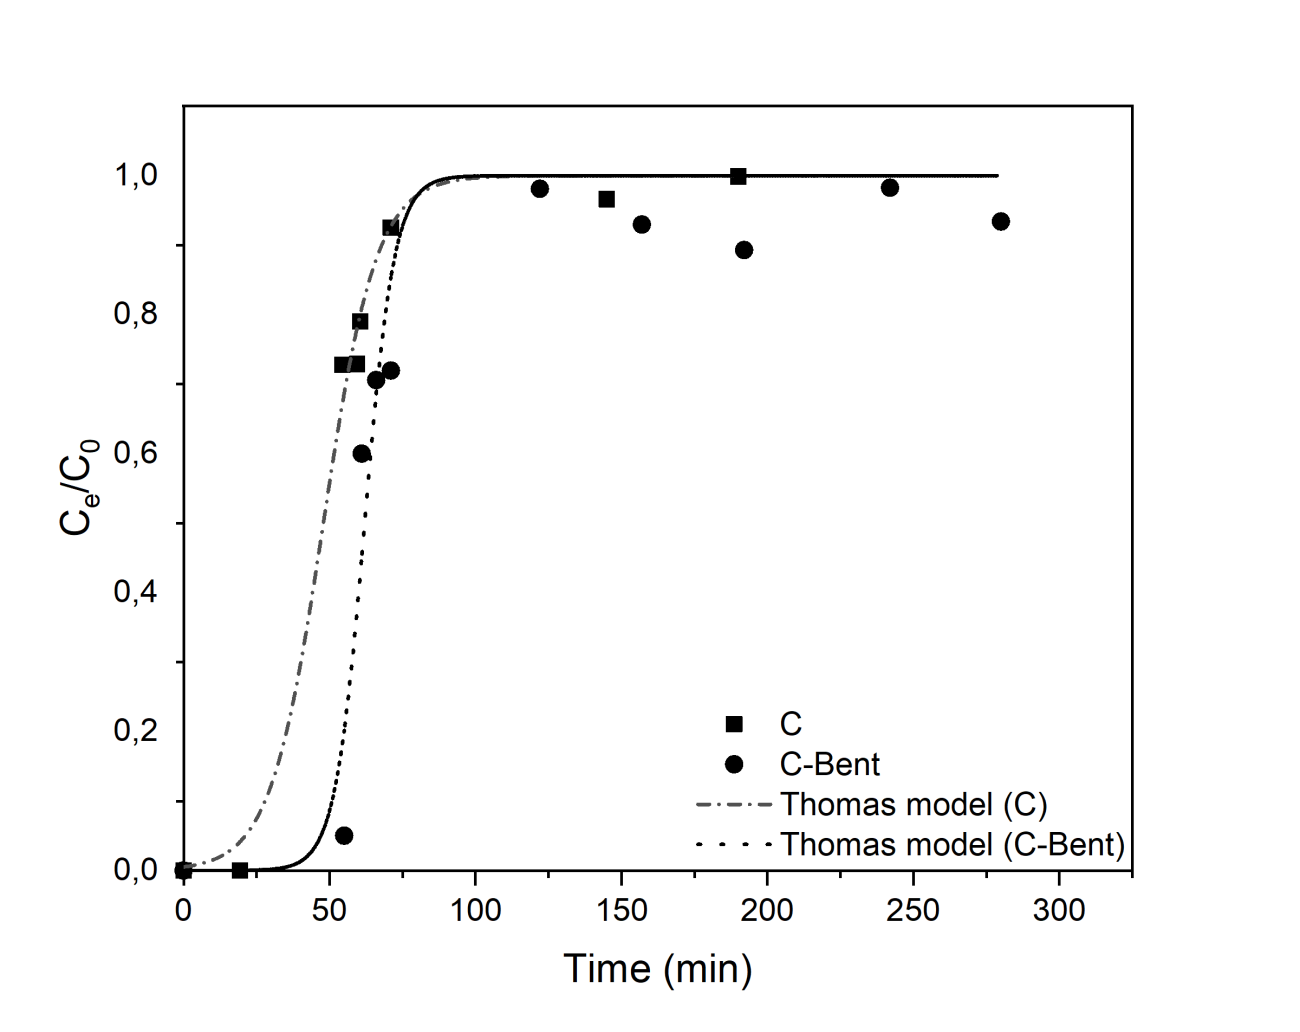
**
